# Supplementary material for: Tunable two-step shape and dimensional changes with temperature of a PNIPAM/CNC hydrogel
Source: Royal Society of Chemistry journal article supplement (doi:10.1039/d2sm00421f), 2022-01-01
Supplement: d2sm00421f1.pdf [file d2sm00421f1.pdf]

## Support information

### Tunable two-step shape and dimensional changes with temperature of PNIPAM/CNCs hydrogel

*Yinghao Xu, Abdellah Ajji\* and Marie-Claude Heuzey\**

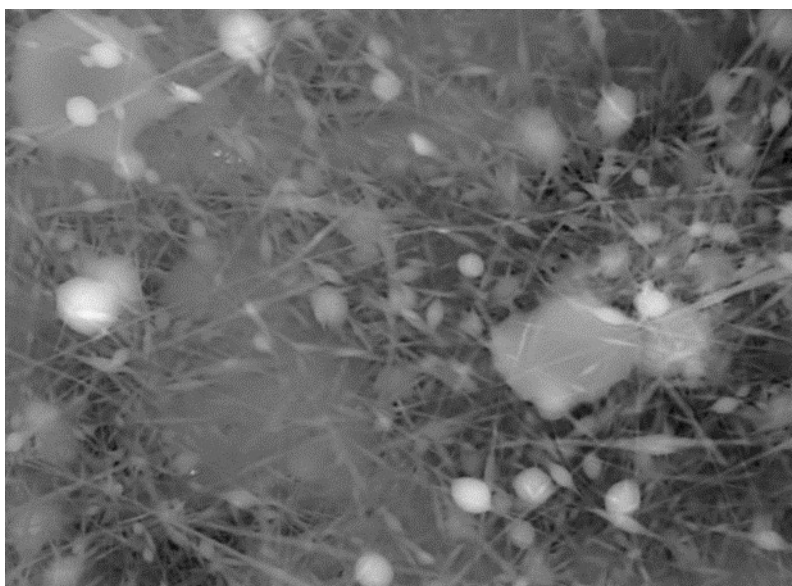

**Figure S1.** SEM image for PNIPAM/CNC with CNC proportion of 15wt%
